# Supplementary material
Source: PubMed Central journal article supplement (PMC6373867)
Supplement: NIHMS1010227-supplement-SM.pdf [file NIHMS1010227-supplement-SM.pdf]

## Supporting Information

### Mesenchymal Stem Cell/Red Blood Cell-Inspired Nanoparticle Therapy in Mice with Carbon Tetrachloride-Induced Acute Liver Failure

Hongxia Liang<sup>1,2,3,#</sup>, Ke Huang<sup>2,3,#</sup>, Teng Su<sup>2,3,#</sup>, Zhenhua Li<sup>2,3,4,#</sup>, Shiqi Hu<sup>2,3</sup>, Phuong-Uyen Dinh<sup>2,3</sup>, Emily A. Wrona<sup>3</sup>, Chen Shao<sup>5</sup>, Li Qiao<sup>2,3,6</sup>, Adam C. Vandergriff<sup>2,3</sup>, M. Taylor Hensley<sup>2,3</sup>, Jhon Cores<sup>2,3</sup>, Tyler Allen<sup>2</sup>, Hongyu Zhang<sup>1</sup>, Qinglei Zeng<sup>1</sup>, Jiyuan Xing<sup>1</sup>, Donald O. Freytes<sup>3</sup>, Deliang Shen<sup>1</sup>, Zujiang Yu<sup>1,\*</sup>, Ke Cheng<sup>1,2,3,\*</sup>

- 1. The First Affiliated Hospital of Zhengzhou University, Zhengzhou, Henan, 450052, China.*
- 2. Department of Molecular Biomedical Sciences and Comparative Medicine Institute, North Carolina State University, Raleigh, NC, 27607, USA.*
- 3. Joint Department of Biomedical Engineering and Comparative Medicine Institute, University of North Carolina at Chapel Hill & North Carolina State University, Chapel Hill and Raleigh, 27599 and 27607, NC, USA.*
- 4. College of Chemistry & Environmental Science, Chemical Biology Key Laboratory of Hebei Province, Analytical Chemistry Key Laboratory of Hebei Province, Key Laboratory of Medicinal Chemistry and Molecular Diagnosis of the Ministry of Education, Hebei University, Baoding, Hebei, 071002, China.*
- 5. Department of Pathology, China-Japan Friendship Hospital, Peking, 100029, China.*
- 6. Department of Cardiology, the Second Hospital of Hebei Medical University, Shijiazhuang, Hebei, 050000, China.*

**Supporting Information Figure S1.**

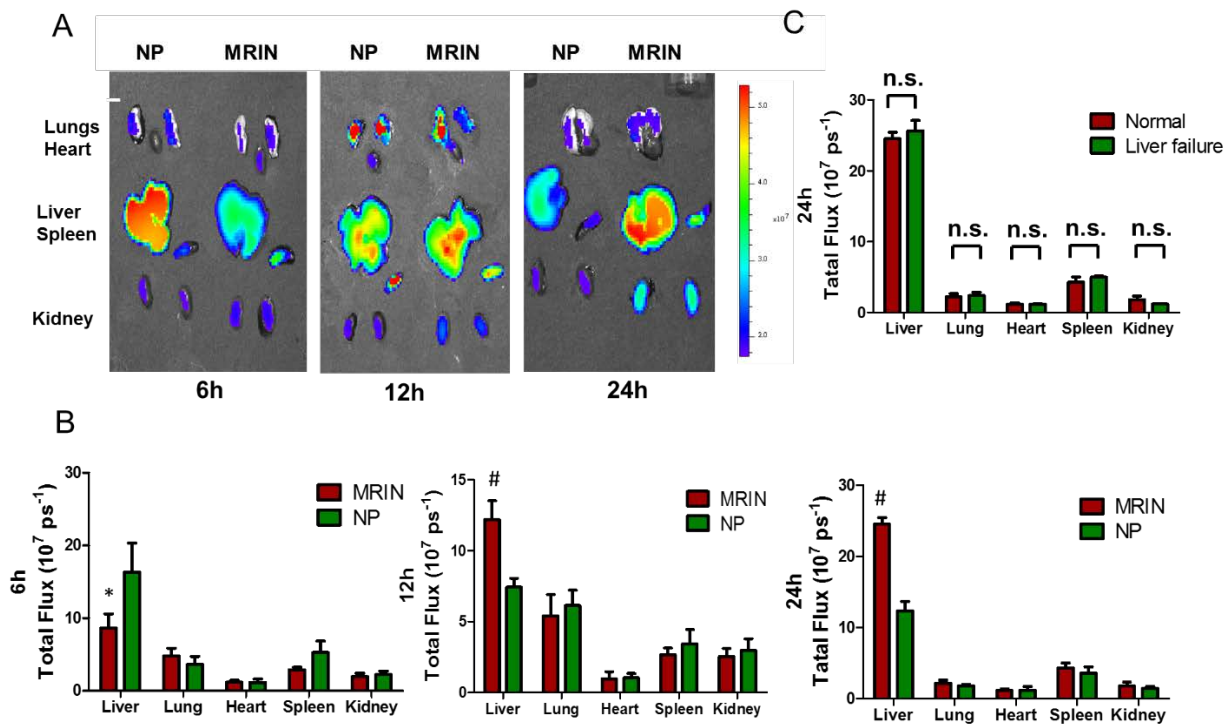

**Figure S1. Biodistribution of MRINs in normal mice.** (A) Representative *ex vivo* fluorescent imaging of major organs (heart, lungs, liver, spleen and kidneys) 6, 12, and 24 hrs post intravenous NP and MRIN injections. (B) Quantitative analysis of fluorescent intensities (n=3 animals per group). (C) Comparison of MRIN biodistribution in normal and liver failure mice (n=3 animals per group). \* indicates  $P < 0.05$  when compared to NP group; # indicates  $P < 0.01$  when compared to NP group; n.s. indicates  $P > 0.05$ . Student's *t*-test for comparison between 2 groups and one way ANOVA for comparison among 3 and more groups. All data are expressed the Means  $\pm$  SD.
